# Supplementary material for: Hepatic Mitochondrial Oxidative Metabolism and Lipogenesis Synergistically Adapt to Mediate Healthy Embryonic-to-Neonatal Transition in Chicken
Source: PubMed Central journal article supplement (PMC6934531; doi:10.1038/s41598-019-56715-1), 2019-12-27
Supplement: 41598_2019_56715_MOESM1_ESM.pdf [file 41598_2019_56715_MOESM1_ESM.pdf]

**Hepatic Mitochondrial Oxidative Metabolism and Lipogenesis Synergistically  
Adapt to Mediate Healthy Embryonic-to-Neonatal Transition in Chicken**

Chaitra Surugihalli<sup>1</sup>, Tom E. Porter<sup>1</sup>, Angela Chan<sup>1</sup>, Linda S. Farley<sup>1</sup>, Meghan Maguire<sup>1</sup>,  
Christine Zhang<sup>1</sup>, Nathan Kattapuram<sup>1</sup>, Muhammed S. Muyyarikkandy<sup>1</sup>, Hsiao-Ching  
Liu<sup>2</sup>, Nishanth E. Sunny<sup>1\*</sup>

<sup>1</sup>Department of Animal and Avian Sciences, University of Maryland,  
College Park, MD 20742, USA

<sup>2</sup>Department of Animal Science, North Carolina State University,  
Raleigh, NC 27695, USA

\*Correspondence and requests for materials should be addressed to N.E.S  
(e-mail: [nsunny@umd.edu](mailto:nsunny@umd.edu)). Department of Animal and Avian Sciences, University of  
Maryland, College Park, MD 20742, USA

|                                                              | <b>e14</b>  | <b>e18</b>              | <b>ph3</b>                | <b>ph7</b>                 | <b>p-value</b> |
|--------------------------------------------------------------|-------------|-------------------------|---------------------------|----------------------------|----------------|
| <b>Embryo weight</b><br>(g ± SEM)                            | 13.6 ± 0.32 | 27.04 ± 0.53            |                           |                            |                |
| <b>Chick weight</b><br>(g ± SEM)                             |             |                         | 60.1 ± 0.81               | 117.7 ± 5.28               |                |
| <b>Liver weight</b><br>(g ± SEM)                             | 0.22 ± 0.00 | 0.61 ± 0.02             | 2.50 ± 0.09 <sup>bd</sup> | 5.70 ± 0.55 <sup>cef</sup> | <0.0001        |
| <b>Liver weight</b><br>(% body weight)                       | 2.01 ± 0.04 | 2.29 ± 0.09             | 4.14 ± 0.13 <sup>bd</sup> | 4.78 ± 0.28 <sup>ce</sup>  | <0.0001        |
| <b>% Liver triglycerides</b>                                 | 0.23 ± 0.05 | 0.74 ± 0.12             | 9.36 ± 1.79 <sup>bd</sup> | 9.24 ± 1.37 <sup>ce</sup>  | <0.0001        |
| <b>Serum insulin</b><br>(µIU/mL ± SEM)                       | 3.14 ± 0.11 | 3.80 ± 0.12             | 8.58 ± 1.28 <sup>bd</sup> | 9.30 ± 1.06 <sup>ce</sup>  | <0.0001        |
| <b>Serum glucose</b><br>(mM ± SEM)                           | 6.95 ± 0.21 | 10.13 ± 0.13            | 11.29 ± 1.22 <sup>b</sup> | 12.98 ± 1.49 <sup>c</sup>  | 0.0007         |
| <b>Liver glycogen</b><br>(mg glucose/ g liver protein ± SEM) | 20.0 ± 6.0  | 78.1 ± 6.4 <sup>a</sup> | 248 ± 35.4 <sup>bd</sup>  | 99.1 ± 9.6 <sup>cf</sup>   | <0.0001        |

**Supplementary Table S1. Metabolic and phenotypic adaptations during embryonic to neonatal transition.** n = 6-9/ group; results were considered significant at  $p \leq 0.05$  following one way ANOVA and pairwise mean comparisons, represented by the following alphabets. 'a' - e14 vs. e18; 'b' - e14 vs. ph3; 'c' - e14 vs. ph7; 'd' - e18 vs. ph3; 'e' - e18 vs. ph7; 'f' - ph3 vs. ph7.

| <b>Serum Acyl carnitines<br/>(nmoles/L ± SEM)</b> | <b>e14</b>  | <b>e18</b>               | <b>ph3</b>                | <b>ph7</b>                | <b>p-value</b> |
|---------------------------------------------------|-------------|--------------------------|---------------------------|---------------------------|----------------|
| Carnitine                                         | 101 ± 30.7  | 262 ± 31.8 <sup>a</sup>  | 144 ± 11.1 <sup>d</sup>   | 145 ± 10.9 <sup>e</sup>   | 0.0001         |
| Acetyl carnitine                                  | 60.7 ± 10.2 | 138 ± 18.9 <sup>a</sup>  | 29.1 ± 2.39 <sup>d</sup>  | 27.9 ± 3.77 <sup>e</sup>  | <0.0001        |
| Propionyl carnitine                               | 1.16 ± 0.22 | 4.08 ± 0.51 <sup>a</sup> | 3.31 ± 0.72 <sup>b</sup>  | 1.90 ± 0.32 <sup>e</sup>  | 0.0030         |
| n-Butyrylcarnitine                                | 0.71 ± 0.14 | 4.64 ± 0.49 <sup>a</sup> | 1.07 ± 0.25 <sup>d</sup>  | 0.62 ± 0.22 <sup>e</sup>  | <0.0001        |
| Butyrylcarnitine                                  | 0.90 ± 0.07 | 4.64 ± 0.49 <sup>a</sup> | 1.51 ± 0.18 <sup>d</sup>  | 0.93 ± 0.17 <sup>e</sup>  | <0.0001        |
| Valerylcarnitine                                  | 0.21 ± 0.02 | 0.81 ± 0.08 <sup>a</sup> | 0.13 ± 0.03 <sup>d</sup>  | 0.06 ± 0.01 <sup>e</sup>  | <0.0001        |
| Isovalerylcarnitine                               | 0.24 ± 0.03 | 0.72 ± 0.14 <sup>a</sup> | 0.55 ± 0.13               | 0.34 ± 0.06               | 0.0223         |
| Hexanoylcarnitine                                 | 0.08 ± 0.01 | 0.26 ± 0.06 <sup>a</sup> | 0.24 ± 0.05               | 0.18 ± 0.02               | 0.0264         |
| Octanoylcarnitine                                 | 0.03 ± 0.01 | 0.08 ± 0.02              | 0.05 ± 0.02               | 0.04 ± 0.01               | 0.0827         |
| Myristoylcarnitine                                | 0.63 ± 0.04 | 0.72 ± 0.05              | 0.07 ± 0.03 <sup>bd</sup> | 0.05 ± 0.01 <sup>ce</sup> | <0.0001        |
| Palmitoylcarnitine                                | 7.37 ± 0.19 | 6.96 ± 0.45              | 0.80 ± 0.28 <sup>bd</sup> | 1.11 ± 0.20 <sup>ce</sup> | <0.0001        |

**Supplementary Table S2. Serum carnitine and acylcarnitine levels during embryonic-to-neonatal transition.** n = 6-9/ group; results were considered significant at  $p \leq 0.05$  following one way ANOVA and pairwise mean comparisons, represented by the following alphabets. 'a'- e14 vs. e18; 'b' - e14 vs. ph3; 'c' - e14 vs. ph7; 'd' - e18 vs. ph3; 'e' - e18 vs. ph7; 'f' - ph3 vs. ph7.

| <b>Liver Acylcarnitines<br/>(<math>\mu\text{g/ g liverprotein} \pm</math><br/>SEM)</b> | <b>e14</b>      | <b>e18</b>                   | <b>ph3</b>                     | <b>ph7</b>                    | <b>p-value</b> |
|----------------------------------------------------------------------------------------|-----------------|------------------------------|--------------------------------|-------------------------------|----------------|
| Carnitine                                                                              | 113 $\pm$ 10.6  | 220 $\pm$ 37.4 <sup>a</sup>  | 61.1 $\pm$ 6.23 <sup>d</sup>   | 58.2 $\pm$ 6.89 <sup>e</sup>  | <0.0001        |
| Acetyl carnitine                                                                       | 12.5 $\pm$ 2.98 | 23.7 $\pm$ 3.29 <sup>a</sup> | 3.94 $\pm$ 0.96 <sup>d</sup>   | 10.3 $\pm$ 2.24 <sup>e</sup>  | <0.0001        |
| Propionyl Carnitine                                                                    | 26.9 $\pm$ 2.75 | 28.5 $\pm$ 5.19              | 5.31 $\pm$ 0.56 <sup>bd</sup>  | 2.22 $\pm$ 0.24 <sup>ce</sup> | <0.0001        |
| n-Butyrylcarnitine                                                                     | 5.93 $\pm$ 0.62 | 11.6 $\pm$ 2.14 <sup>a</sup> | 0.17 $\pm$ 0.02 <sup>bd</sup>  | 0.14 $\pm$ 0.05 <sup>ce</sup> | <0.0001        |
| Butyrylcarnitine                                                                       | 5.93 $\pm$ 0.62 | 11.6 $\pm$ 2.14 <sup>a</sup> | 0.17 $\pm$ 0.02 <sup>bd</sup>  | 0.16 $\pm$ 0.04 <sup>ce</sup> | <0.0001        |
| Valerylcarnitine                                                                       | 0.46 $\pm$ 0.04 | 0.70 $\pm$ 0.15              | 0.01 $\pm$ 0.00 <sup>bd</sup>  | 0.00 $\pm$ 0.00 <sup>ce</sup> | <0.0001        |
| Isovalerylcarnitine                                                                    | 1.69 $\pm$ 0.18 | 1.45 $\pm$ 0.40              | 0.06 $\pm$ 0.01 <sup>bd</sup>  | 0.04 $\pm$ 0.01 <sup>ce</sup> | <0.0001        |
| Hexanoylcarnitine                                                                      | 0.08 $\pm$ 0.03 | 0.28 $\pm$ 0.06 <sup>a</sup> | 0.01 $\pm$ 0.00 <sup>d</sup>   | 0.02 $\pm$ 0.00 <sup>e</sup>  | <0.0001        |
| Octanoylcarnitine                                                                      | 0.02 $\pm$ 0.01 | 0.15 $\pm$ 0.03 <sup>a</sup> | 0.002 $\pm$ 0.001 <sup>d</sup> | 0.01 $\pm$ 0.00 <sup>e</sup>  | <0.0001        |
| Myristoylcarnitine                                                                     | 0.17 $\pm$ 0.06 | 0.83 $\pm$ 0.24 <sup>a</sup> | 0.02 $\pm$ 0.01 <sup>d</sup>   | 0.01 $\pm$ 0.00 <sup>e</sup>  | 0.0003         |
| Palmitoylcarnitine                                                                     | 6.00 $\pm$ 2.10 | 27.2 $\pm$ 7.55 <sup>a</sup> | 0.35 $\pm$ 0.08 <sup>d</sup>   | 0.33 $\pm$ 0.07 <sup>e</sup>  | 0.0002         |

**Supplementary Table S3. Liver carnitine and acylcarnitine levels during embryonic-to-neonatal transition.** n = 6-9/  
group; results were considered significant at  $p \leq 0.05$  following one way ANOVA and pairwise mean comparisons,  
represented by the following alphabets. 'a'- e14 vs. e18; 'b' - e14 vs. ph3; 'c' - e14 vs. ph7; 'd' - e18 vs. ph3; 'e' - e18 vs.  
ph7; 'f' - ph3 vs. ph7

| <b>Citrate (APE ± SEM)</b>         |                            |                             |                            |                             |                            |                            |
|------------------------------------|----------------------------|-----------------------------|----------------------------|-----------------------------|----------------------------|----------------------------|
|                                    | <b>M+1</b>                 | <b>M+2</b>                  | <b>M+3</b>                 | <b>M+4</b>                  | <b>M+5</b>                 | <b>M+6</b>                 |
| <b>e14</b>                         | 1.98 ± 0.29                | 9.90 ± 1.39                 | 6.99 ± 1.03                | 3.77 ± 0.58                 | 2.25 ± 0.39                | 0.91 ± 0.17                |
| <b>e18</b>                         | 7.69 ± 2.08                | 24.24 ± 3.27 <sup>a</sup>   | 30.26 ± 4.90 <sup>a</sup>  | 33.72 ± 5.54 <sup>a</sup>   | 38.59 ± 6.20 <sup>a</sup>  | 33.78 ± 5.79 <sup>a</sup>  |
| <b>ph3</b>                         | 20.37 ± 1.20 <sup>bd</sup> | 45.84 ± 0.87 <sup>bd</sup>  | 43.81 ± 1.36 <sup>bd</sup> | 36.72 ± 1.10 <sup>b</sup>   | 26.15 ± 1.11 <sup>bd</sup> | 17.33 ± 1.18 <sup>bd</sup> |
| <b>ph7</b>                         | 11.76 ± 0.69 <sup>cf</sup> | 42.01 ± 1.90 <sup>ce</sup>  | 29.46 ± 1.64 <sup>cf</sup> | 17.60 ± 1.21 <sup>cef</sup> | 6.76 ± 0.58 <sup>ef</sup>  | 2.09 ± 0.19 <sup>ef</sup>  |
| <b>p-value</b>                     | <0.0001                    | <0.0001                     | <0.0001                    | <0.0001                     | <0.0001                    | <0.0001                    |
| <b>α-Ketoglutarate (APE ± SEM)</b> |                            |                             |                            |                             |                            |                            |
|                                    | <b>M+1</b>                 | <b>M+2</b>                  | <b>M+3</b>                 | <b>M+4</b>                  | <b>M+5</b>                 |                            |
| <b>e14</b>                         | 0.22 ± 0.03                | 1.98 ± 0.23                 | 1.09 ± 0.08                | 0.64 ± 0.05                 | 0.24 ± 0.03                |                            |
| <b>e18</b>                         | 1.34 ± 0.19                | 18.36 ± 0.89 <sup>a</sup>   | 15.87 ± 1.35 <sup>a</sup>  | 19.10 ± 1.72 <sup>a</sup>   | 23.32 ± 2.42 <sup>a</sup>  |                            |
| <b>ph3</b>                         | 1.01 ± 0.09                | 24.24 ± 0.96 <sup>bd</sup>  | 12.70 ± 0.65 <sup>bd</sup> | 9.27 ± 0.55 <sup>bd</sup>   | 6.74 ± 0.69 <sup>bd</sup>  |                            |
| <b>ph7</b>                         | 0.25 ± 0.03                | 12.78 ± 0.76 <sup>cef</sup> | 4.52 ± 0.27 <sup>cef</sup> | 2.17 ± 0.14 <sup>ef</sup>   | 0.50 ± 0.03 <sup>ef</sup>  |                            |
| <b>p-value</b>                     | <0.0001                    | <0.0001                     | <0.0001                    | <0.0001                     | <0.0001                    |                            |
| <b>Succinate (APE ± SEM)</b>       |                            |                             |                            |                             |                            |                            |
|                                    | <b>M+1</b>                 | <b>M+2</b>                  | <b>M+3</b>                 | <b>M+4</b>                  |                            |                            |
| <b>e14</b>                         | 0.30 ± 0.04                | 2.60 ± 0.20                 | 1.37 ± 0.09                | 1.17 ± 0.35                 |                            |                            |
| <b>e18</b>                         | -0.09 ± 0.10               | 6.77 ± 1.03 <sup>a</sup>    | 3.01 ± 0.58 <sup>a</sup>   | 9.06 ± 1.82 <sup>a</sup>    |                            |                            |
| <b>ph3</b>                         | 0.56 ± 0.17                | 13.94 ± 0.94 <sup>bd</sup>  | 5.47 ± 0.48 <sup>bd</sup>  | 5.30 ± 0.53 <sup>d</sup>    |                            |                            |
| <b>ph7</b>                         | 0.99 ± 0.86                | 10.48 ± 0.90 <sup>cf</sup>  | 3.74 ± 0.96 <sup>ce</sup>  | 2.82 ± 1.63 <sup>e</sup>    |                            |                            |
| <b>p-value</b>                     | ns                         | <0.0001                     | 0.0006                     | 0.0016                      |                            |                            |

| <b>Fumarate (APE ± SEM)</b> |             |                           |                           |                           |
|-----------------------------|-------------|---------------------------|---------------------------|---------------------------|
|                             | <b>M+1</b>  | <b>M+2</b>                | <b>M+3</b>                | <b>M+4</b>                |
| <b>e14</b>                  | 1.54 ± 0.15 | 2.78 ± 0.20               | 4.77 ± 0.19               | 1.42 ± 0.05               |
| <b>e18</b>                  | 5.45 ± 1.78 | 14.10 ± 2.72 <sup>a</sup> | 26.22 ± 4.83 <sup>a</sup> | 23.93 ± 4.78 <sup>a</sup> |
| <b>ph3</b>                  | 0.74 ± 0.17 | 3.52 ± 0.53 <sup>d</sup>  | 4.85 ± 0.24 <sup>d</sup>  | 3.42 ± 0.16 <sup>d</sup>  |
| <b>ph7</b>                  | 0.58 ± 0.11 | 1.83 ± 0.22 <sup>e</sup>  | 1.31 ± 0.05 <sup>e</sup>  | 0.54 ± 0.05 <sup>e</sup>  |
| <b>p-value</b>              | 0.0119      | <0.0001                   | <0.0001                   | <0.0001                   |
| <b>Malate (APE ± SEM)</b>   |             |                           |                           |                           |
|                             | <b>M+1</b>  | <b>M+2</b>                | <b>M+3</b>                | <b>M+4</b>                |
| <b>e14</b>                  | 1.32 ± 0.09 | 2.09 ± 0.15               | 3.87 ± 0.16               | 1.49 ± 0.07               |
| <b>e18</b>                  | 4.74 ± 1.39 | 10.66 ± 2.92 <sup>a</sup> | 27.91 ± 5.04 <sup>a</sup> | 24.57 ± 5.29 <sup>a</sup> |
| <b>ph3</b>                  | 1.61 ± 0.11 | 3.92 ± 0.27               | 6.09 ± 0.32 <sup>d</sup>  | 3.87 ± 0.27 <sup>d</sup>  |
| <b>ph7</b>                  | 1.11 ± 0.06 | 2.02 ± 0.07 <sup>e</sup>  | 1.37 ± 0.04 <sup>e</sup>  | 0.54 ± 0.02 <sup>e</sup>  |
| <b>p-value</b>              | 0.0068      | 0.0013                    | <0.0001                   | <0.0001                   |

**Supplementary Table S4. Enrichments of TCA cycle intermediates in isolated liver mitochondria from uniformly labeled [<sup>13</sup>C<sub>3</sub>]pyruvate, following 10 min of incubation.** n = 6-9/ group; results were considered significant at p ≤ 0.05 following one way ANOVA and pairwise mean comparisons, represented by the following alphabets. 'a'- e14 vs. e18; 'b' - e14 vs. ph3; 'c' - e14 vs. ph7; 'd' - e18 vs. ph3; 'e' - e18 vs. ph7; 'f' - ph3 vs. ph7.

| <b>Citrate (APE ± SEM)</b>         |                            |                             |                            |                            |                           |                            |
|------------------------------------|----------------------------|-----------------------------|----------------------------|----------------------------|---------------------------|----------------------------|
|                                    | <b>M+1</b>                 | <b>M+2</b>                  | <b>M+3</b>                 | <b>M+4</b>                 | <b>M+5</b>                | <b>M+6</b>                 |
| <b>e14</b>                         | 4.93 ± 0.19                | 20.58 ± 0.96                | 15.24 ± 0.79               | 8.99 ± 0.52                | 5.49 ± 0.42               | 2.11 ± 0.18                |
| <b>e18</b>                         | 7.01 ± 1.57                | 30.77 ± 2.35 <sup>a</sup>   | 28.89 ± 3.14 <sup>a</sup>  | 31.19 ± 3.13 <sup>a</sup>  | 34.37 ± 3.90 <sup>a</sup> | 30.55 ± 4.00 <sup>a</sup>  |
| <b>ph3</b>                         | 20.86 ± 1.33 <sup>bd</sup> | 47.36 ± 0.90 <sup>bd</sup>  | 44.58 ± 1.30 <sup>bd</sup> | 37.52 ± 0.97 <sup>b</sup>  | 26.27 ± 0.91 <sup>b</sup> | 17.13 ± 1.18 <sup>bd</sup> |
| <b>ph7</b>                         | 9.15 ± 1.63 <sup>f</sup>   | 37.06 ± 6.14 <sup>cf</sup>  | 25.84 ± 4.51 <sup>cf</sup> | 15.87 ± 2.86 <sup>ef</sup> | 6.37 ± 1.19 <sup>ef</sup> | 2.17 ± 0.40 <sup>ef</sup>  |
| <b>p-value</b>                     | <0.0001                    | 0.0002                      | <0.0001                    | <0.0001                    | <0.0001                   | <0.0001                    |
| <b>α-Ketoglutarate (APE ± SEM)</b> |                            |                             |                            |                            |                           |                            |
|                                    | <b>M+1</b>                 | <b>M+2</b>                  | <b>M+3</b>                 | <b>M+4</b>                 | <b>M+5</b>                |                            |
| <b>e14</b>                         | 0.49 ± 0.04                | 7.03 ± 0.16                 | 3.01 ± 0.07                | 1.75 ± 0.04                | 0.70 ± 0.02               |                            |
| <b>e18</b>                         | 0.91 ± 0.06                | 22.70 ± 1.21 <sup>a</sup>   | 13.09 ± 0.66 <sup>a</sup>  | 16.34 ± 0.90 <sup>a</sup>  | 17.86 ± 1.53 <sup>a</sup> |                            |
| <b>ph3</b>                         | 0.87 ± 0.08                | 23.82 ± 0.93 <sup>b</sup>   | 12.12 ± 0.64 <sup>b</sup>  | 8.77 ± 0.54 <sup>bd</sup>  | 6.18 ± 0.62 <sup>bd</sup> |                            |
| <b>ph7</b>                         | 0.35 ± 0.04                | 12.62 ± 0.30 <sup>cef</sup> | 4.48 ± 0.10 <sup>ef</sup>  | 2.18 ± 0.05 <sup>ef</sup>  | 0.49 ± 0.01 <sup>ef</sup> |                            |
| <b>p-value</b>                     | ns                         | <0.0001                     | <0.0001                    | <0.0001                    | <0.0001                   |                            |
| <b>Succinate (APE ± SEM)</b>       |                            |                             |                            |                            |                           |                            |
|                                    | <b>M+1</b>                 | <b>M+2</b>                  | <b>M+3</b>                 | <b>M+4</b>                 |                           |                            |
| <b>e14</b>                         | 0.81 ± 0.06                | 6.77 ± 0.42                 | 2.75 ± 0.24                | 2.18 ± 0.41                |                           |                            |
| <b>e18</b>                         | -0.04 ± 0.18               | 9.93 ± 1.05 <sup>a</sup>    | 4.47 ± 0.52                | 9.94 ± 1.56 <sup>a</sup>   |                           |                            |
| <b>ph3</b>                         | 0.60 ± 0.17                | 15.11 ± 1.23 <sup>bd</sup>  | 5.83 ± 0.58 <sup>b</sup>   | 5.56 ± 0.60 <sup>bd</sup>  |                           |                            |
| <b>ph7</b>                         | 0.06 ± 0.07                | 9.45 ± 0.32 <sup>cf</sup>   | 2.73 ± 0.13 <sup>f</sup>   | 1.47 ± 0.36 <sup>ef</sup>  |                           |                            |
| <b>p-value</b>                     | ns                         | <0.0001                     | <0.0001                    | <0.0001                    |                           |                            |

| <b>Fumarate (APE ± SEM)</b> |             |                          |                            |                           |
|-----------------------------|-------------|--------------------------|----------------------------|---------------------------|
|                             | <b>M+1</b>  | <b>M+2</b>               | <b>M+3</b>                 | <b>M+4</b>                |
| <b>e14</b>                  | 2.04 ± 0.18 | 3.19 ± 0.25              | 4.97 ± 0.21                | 1.60 ± 0.07               |
| <b>e18</b>                  | 0.82 ± 0.28 | 6.33 ± 0.93 <sup>a</sup> | 15.26 ± 2.10 <sup>a</sup>  | 11.12 ± 1.76 <sup>a</sup> |
| <b>ph3</b>                  | 0.72 ± 0.11 | 4.37 ± 0.70              | 4.67 ± 0.20 <sup>d</sup>   | 3.24 ± 0.26 <sup>d</sup>  |
| <b>ph7</b>                  | 0.64 ± 0.07 | 1.91 ± 0.12 <sup>e</sup> | 1.30 ± 0.06 <sup>cef</sup> | 0.49 ± 0.04 <sup>e</sup>  |
| <b>p-value</b>              | <0.0001     | 0.0003                   | <0.0001                    | <0.0001                   |
| <b>Malate (APE ± SEM)</b>   |             |                          |                            |                           |
|                             | <b>M+1</b>  | <b>M+2</b>               | <b>M+3</b>                 | <b>M+4</b>                |
| <b>e14</b>                  | 1.75 ± 0.11 | 2.75 ± 0.18              | 4.62 ± 0.19                | 1.88 ± 0.09               |
| <b>e18</b>                  | 1.42 ± 0.18 | 4.25 ± 0.59              | 18.56 ± 3.02 <sup>a</sup>  | 12.20 ± 2.50 <sup>a</sup> |
| <b>ph3</b>                  | 1.49 ± 0.12 | 3.90 ± 0.30              | 5.95 ± 0.27 <sup>d</sup>   | 3.75 ± 0.29 <sup>d</sup>  |
| <b>ph7</b>                  | 1.16 ± 0.04 | 2.27 ± 0.08              | 1.50 ± 0.06 <sup>ef</sup>  | 0.61 ± 0.03 <sup>e</sup>  |
| <b>p-value</b>              | 0.0257      | 0.0018                   | <0.0001                    | <0.0001                   |

**Supplementary Table S5. Enrichments of TCA cycle intermediates in isolated liver mitochondria from uniformly labeled [<sup>13</sup>C<sub>3</sub>]pyruvate, following 20 min of incubation.** n = 6-9/ group; results were considered significant at p ≤ 0.05 following one way ANOVA and pairwise mean comparisons, represented by the following alphabets. ‘a’ - e14 vs. e18; ‘b’ - e14 vs. ph3; ‘c’ - e14 vs. ph7; ‘d’ - e18 vs. ph3; ‘e’ - e18 vs. ph7; ‘f’ - ph3 vs. ph



| <b>Lactate (µg/ mg mitochondria ± SEM)</b>         |                           |                           |                           |                |
|----------------------------------------------------|---------------------------|---------------------------|---------------------------|----------------|
|                                                    | <b>0 min</b>              | <b>5 min</b>              | <b>10 min</b>             | <b>p-value</b> |
| <b>e14</b>                                         | 0.41 ± 0.08               | 0.56 ± 0.01               | 0.43 ± 0.12               | ns             |
| <b>e18</b>                                         | 0.58 ± 0.17               | 0.44 ± 0.06               | 0.51 ± 0.09               | ns             |
| <b>ph3</b>                                         | 0.76 ± 0.24               | 1.01 ± 0.35 <sup>d</sup>  | 0.65 ± 0.20               | ns             |
| <b>ph7</b>                                         | 0.79 ± 0.20               | 0.47 ± 0.17 <sup>f</sup>  | 0.67 ± 0.18               | ns             |
| <b>p-value</b>                                     | ns                        | ns                        | ns                        |                |
| <b>Pyruvate (µg/ mg mitochondria ± SEM)</b>        |                           |                           |                           |                |
|                                                    | <b>0 min</b>              | <b>5 min</b>              | <b>10 min</b>             | <b>p-value</b> |
| <b>e14</b>                                         | 0.14 ± 0.01               | 0.06 ± 0.01               | 0.06 ± 0.01               | <0.0001        |
| <b>e18</b>                                         | 0.23 ± 0.03               | 0.08 ± 0.01               | 0.09 ± 0.01               | <0.0001        |
| <b>ph3</b>                                         | 0.56 ± 0.07 <sup>bd</sup> | 0.30 ± 0.04 <sup>bd</sup> | 0.25 ± 0.03 <sup>bd</sup> | 0.0006         |
| <b>ph7</b>                                         | 0.35 ± 0.06 <sup>cf</sup> | 0.20 ± 0.04 <sup>c</sup>  | 0.17 ± 0.03               | ns             |
| <b>p-value</b>                                     | <0.0001                   | <0.0001                   | <0.0001                   |                |
| <b>Citrate (µg/ mg mitochondria ± SEM)</b>         |                           |                           |                           |                |
|                                                    | <b>0 min</b>              | <b>5 min</b>              | <b>10 min</b>             | <b>p-value</b> |
| <b>e14</b>                                         | 0.21 ± 0.05               | 0.15 ± 0.01               | 0.18 ± 0.02               | ns             |
| <b>e18</b>                                         | 0.33 ± 0.09               | 0.24 ± 0.03               | 0.25 ± 0.03               | ns             |
| <b>ph3</b>                                         | 2.35 ± 0.49 <sup>bd</sup> | 0.95 ± 0.33               | 0.72 ± 0.15               | 0.0066         |
| <b>ph7</b>                                         | 2.06 ± 0.39 <sup>ce</sup> | 1.52 ± 0.77               | 0.66 ± 0.11               | ns             |
| <b>p-value</b>                                     | <0.0001                   | ns                        | ns                        |                |
| <b>α-Ketoglutarate (µg/ mg mitochondria ± SEM)</b> |                           |                           |                           |                |
|                                                    | <b>0 min</b>              | <b>5 min</b>              | <b>10 min</b>             | <b>p-value</b> |
| <b>e14</b>                                         | 0.02 ± 0.00               | 0.09 ± 0.01               | 0.10 ± 0.00               | <0.0001        |
| <b>e18</b>                                         | 0.02 ± 0.00               | 0.10 ± 0.01               | 0.14 ± 0.01               | <0.0001        |
| <b>ph3</b>                                         | 0.12 ± 0.02 <sup>bd</sup> | 0.29 ± 0.05 <sup>bd</sup> | 0.36 ± 0.04 <sup>bd</sup> | 0.0005         |
| <b>ph7</b>                                         | 0.07 ± 0.01               | 0.23 ± 0.03 <sup>ce</sup> | 0.28 ± 0.04 <sup>ce</sup> | <0.0001        |
| <b>p-value</b>                                     | <0.0001                   | <0.0001                   | <0.0001                   |                |
| <b>Succinate (µg/ mg mitochondria ± SEM)</b>       |                           |                           |                           |                |
|                                                    | <b>0 min</b>              | <b>5 min</b>              | <b>10 min</b>             | <b>p-value</b> |

|                                             |                           |                          |                          |                |
|---------------------------------------------|---------------------------|--------------------------|--------------------------|----------------|
| <b>e14</b>                                  | 0.38 ± 0.08               | 0.84 ± 0.35              | 0.42 ± 0.12              | ns             |
| <b>e18</b>                                  | 0.35 ± 0.06               | 0.50 ± 0.09              | 0.54 ± 0.09              | ns             |
| <b>ph3</b>                                  | 0.55 ± 0.06               | 0.59 ± 0.15              | 0.48 ± 0.07              | ns             |
| <b>ph7</b>                                  | 0.50 ± 0.07               | 0.46 ± 0.08              | 0.38 ± 0.08              | ns             |
| <b>p-value</b>                              | ns                        | ns                       | ns                       |                |
| <b>Fumarate (µg/ mg mitochondria ± SEM)</b> |                           |                          |                          |                |
|                                             | <b>0 min</b>              | <b>5 min</b>             | <b>10 min</b>            | <b>p-value</b> |
| <b>e14</b>                                  | 0.32 ± 0.11               | 1.97 ± 0.16              | 2.11 ± 0.12              | <0.0001        |
| <b>e18</b>                                  | 0.69 ± 0.12               | 3.15 ± 0.22 <sup>a</sup> | 3.13 ± 0.22 <sup>a</sup> | <0.0001        |
| <b>ph3</b>                                  | 2.25 ± 0.22 <sup>bd</sup> | 3.23 ± 0.31 <sup>b</sup> | 3.31 ± 0.29 <sup>b</sup> | 0.0201         |
| <b>ph7</b>                                  | 1.22 ± 0.17 <sup>cf</sup> | 2.38 ± 0.34 <sup>f</sup> | 2.59 ± 0.32              | 0.0048         |
| <b>p-value</b>                              | <0.0001                   | 0.0041                   | 0.0081                   |                |
| <b>Malate (µg/ mg mitochondria ± SEM)</b>   |                           |                          |                          |                |
|                                             | <b>0 min</b>              | <b>5 min</b>             | <b>10 min</b>            | <b>p-value</b> |
| <b>e14</b>                                  | 0.17 ± 0.08               | 1.41 ± 0.14              | 1.61 ± 0.11              | <0.0001        |
| <b>e18</b>                                  | 0.36 ± 0.07               | 2.46 ± 0.35 <sup>a</sup> | 2.63 ± 0.19 <sup>a</sup> | <0.0001        |
| <b>ph3</b>                                  | 1.39 ± 0.14 <sup>bd</sup> | 2.12 ± 0.24 <sup>b</sup> | 1.99 ± 0.24              | 0.0541         |
| <b>ph7</b>                                  | 0.73 ± 0.09               | 1.74 ± 0.25              | 1.64 ± 0.17 <sup>e</sup> | 0.0009         |
| <b>p-value</b>                              | <0.0001                   | 0.0458                   | 0.0018                   |                |

**Supplementary Table S6. Concentrations of TCA cycle intermediates in the isolated mitochondria following 0, 5 and 10 min of incubation.** n = 6-9/ group; results were considered significant at  $p \leq 0.05$  following one way ANOVA and pairwise mean comparisons, represented by the following alphabets. 'a'- e14 vs. e18; 'b' - e14 vs. ph3; 'c' - e14 vs. ph7; 'd' - e18 vs. ph3; 'e' - e18 vs. ph7; 'f' - ph3 vs. ph

| <b>Gene</b>   | <b>Forward primer</b>    | <b>Reverse primer</b>    | <b>Accession No.</b> |
|---------------|--------------------------|--------------------------|----------------------|
| <i>ACACA</i>  | TGGCAGCCATGTTCAGAGAG     | GGAAATTCCTCTTCTGTGCCA    | NM_205505.1          |
| <i>CS</i>     | AGGGATTTTCATCTGGAACACACT | CACCGTGTAGTACTTCATCTCCCT | XM_015300289.2       |
| <i>CPT1A</i>  | TGCTCACTACCGAGACATGG     | GGTACATGACCGGACGGTTT     | XM_015286798.2       |
| <i>ELOVL6</i> | CCGGGCCAATGAACATGT       | TCATGCTCGTTGAACTGCTTCT   | NM_001031539.1       |
| <i>FADS2</i>  | TCTTAATGGGGAGGGAACAGGT   | ACCAGCTTCTTGCATTTTCACA   | NM_001160428.2       |
| <i>FASN</i>   | GGCTACACACTAGTTGGCACT    | CACTGTGTTCCCATGCCTGA     | NM_205155.3          |
| <i>GAPDH</i>  | GATTTAATGAGCCATTCGCAGTT  | CCCAGCGTGCATGTCTAAGTAC   | NM. 205155.3         |
| <i>IL6</i>    | GCAGGACGAGATGTGCAAGA     | GTCCTCCTCCGTCACCTT       | NM_204628.1          |
| <i>MCAD</i>   | CACGCAGTAGGCACACATGAT    | CGGCAGCAGCGCAAAT         |                      |
| <i>NLRP3</i>  | GGTTTACCAGGGGAA ATGAGG   | TTGTGCTTCCAGATGCCGT      | NM_001348947.1       |
| <i>PCK1</i>   | GCAGGGGTTATGATGAGAAGT    | ACGGATCACAGTTTTGAAGAC    | NM_205471.1          |
| <i>PCK2</i>   | CCTTCGCCATGAGCCCCTTTTTTC | CAGCTCCGCCATGACATCCCT    | NM_205470.1          |
| <i>SCD1</i>   | CAATGCCACCTGGCTAGTGA     | CGGCCGATTGCCAAAC         | NM_204890.1          |
| <i>SOD1</i>   | GACCAAAAGATGCAGATAGG     | TCCAGCATTTCCAGTTAGTT     | NM_205064            |
| <i>TLR4</i>   | AGTCTGAAATTGCTGAGCTCAAAT | GCGACGTTAAGCCATGGAAG     | NM_001030693.1       |
| <i>TNFA</i>   | CCATATGACCACGCTCTTTCCG   | AGCAGCAGCAGCAGCAGAGC     | MF000729.1           |

**Supplementary Table S7.** List of primers used for RT-qPCR.

### A. Phosphorylation of AKT

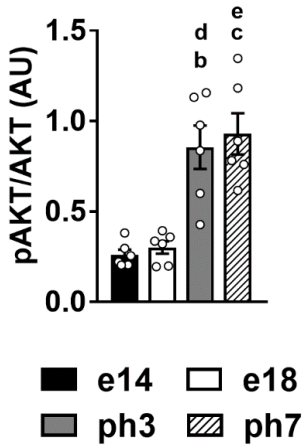

**Supplementary Fig S1. Graphical representation of AKT phosphorylation in the liver.** Densitometry of western blots for phosphorylated AKT (Ser473) relative to total AKT (from Fig 1E). n = 6/ group; Means were considered significant at  $P \leq 0.05$  following pairwise mean comparisons, represented by the following alphabets, 'a'- e14 vs. e18; 'b' - e14 vs. ph3; 'c' - e14 vs. ph7; 'd' - e18 vs. ph3; 'e' - e18 vs. ph7; 'f' - ph3 vs. ph7.

### A. Phosphorylation of AMPK

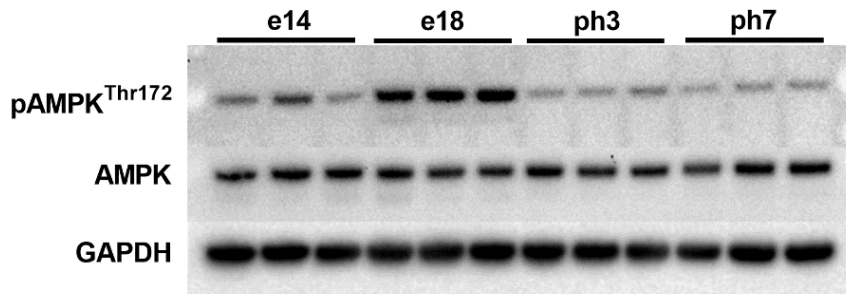

### B. Quantification of AMPK phosphorylation

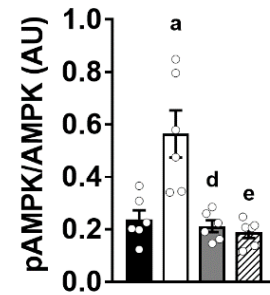

■ e14    □ e18    ■ ph3    ▨ ph7

**Supplementary Fig S2. AMPK phosphorylation in the liver.** (A) Western blot and (B) Densitometry of the blots for phosphorylated AMPK (Thr172) relative to total AMPK. n = 6/ group; Means were considered significant at  $P \leq 0.05$  following pairwise mean comparison, represented by the following alphabets, 'a' - e14 vs. e18; 'b' - e14 vs. ph3; 'c' - e14 vs. ph7; 'd' - e18 vs. ph3; 'e' - e18 vs. ph7; 'f' - ph3 vs. ph7.

## Quantification of mitochondrial proteins

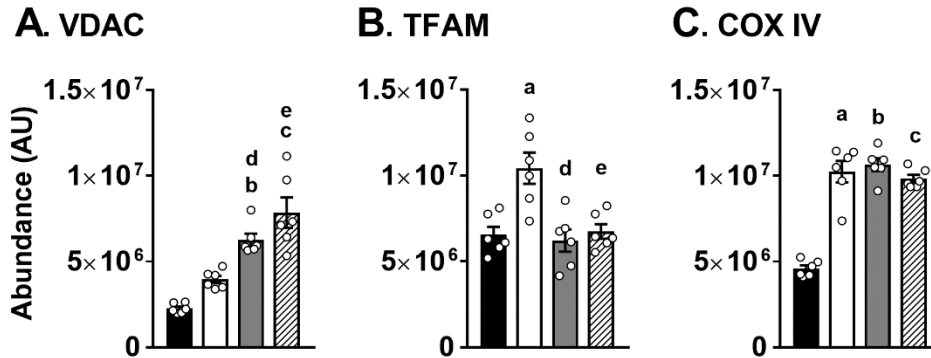

## Quantification of Oxphos complex proteins

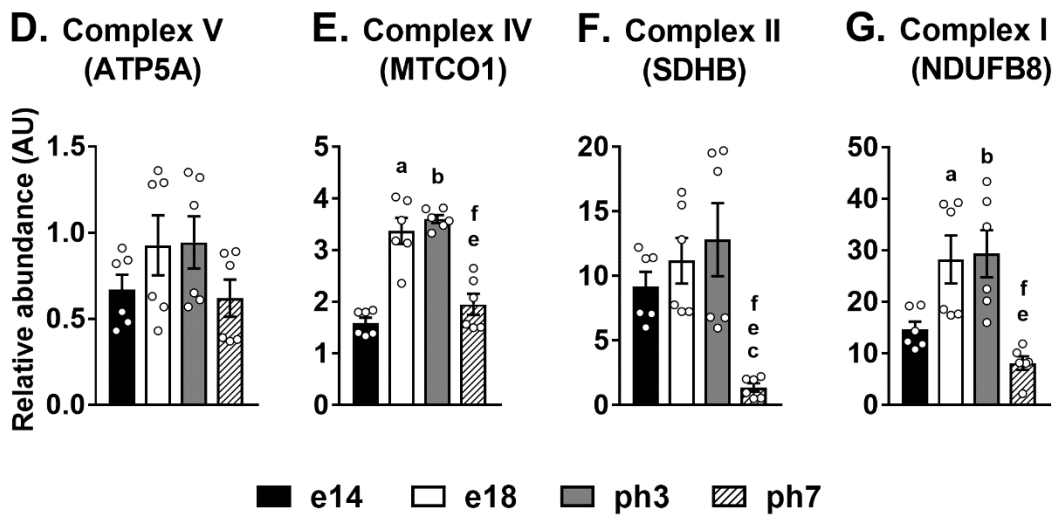

**Supplementary Fig S3. Graphical representation of mitochondrial proteins and Oxphos complex proteins.** Densitometry of mitochondrial proteins (**A**) VDAC (**B**) TFAM (**C**) COX IV (from Fig 4B).and (**D-G**) the Oxphos complex proteins (from Fig 4G). n = 6/ group; Means were considered significant at  $P \leq 0.05$  following pairwise mean comparison, represented by the following alphabets. 'a'- e14 vs. e18; 'b' - e14 vs. ph3; 'c' - e14 vs. ph7; 'd' - e18 vs. ph3; 'e' - e18 vs. ph7; 'f' - ph3 vs. ph7.

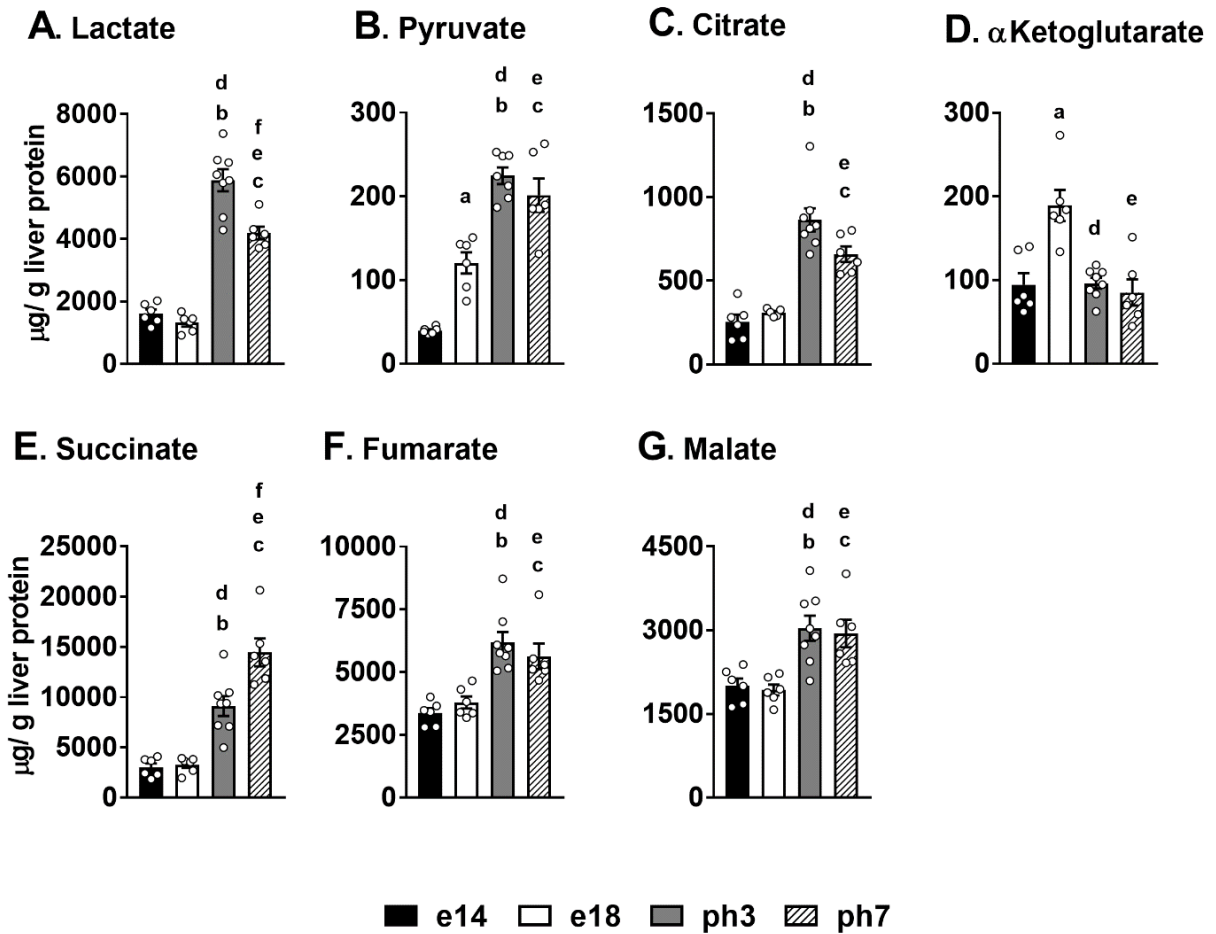

**Supplementary Fig S4. Concentrations TCA cycle intermediates in the liver.**

Changes in concentrations of (A) Lactate (B) Pyruvate (C) Citrate (D) Lactate (E) Succinate (F) Fumarate (G) Malate. n = 6/ group; results were considered significant at  $P \leq 0.05$  following pairwise mean comparisons, represented by the following alphabets. 'a'- e14 vs. e18; 'b' - e14 vs. ph3; 'c' - e14 vs. ph7; 'd' - e18 vs. ph3; 'e' - e18 vs. ph7; 'f' - ph3 vs. ph7.
